# Supplementary material for: Genome Size Variation across a Cypriot Fabeae Tribe Germplasm Collection
Source: MDPI journal article supplement (doi:10.3390/plants12071469), 2023-03-27
Supplement: s1 [file s1]

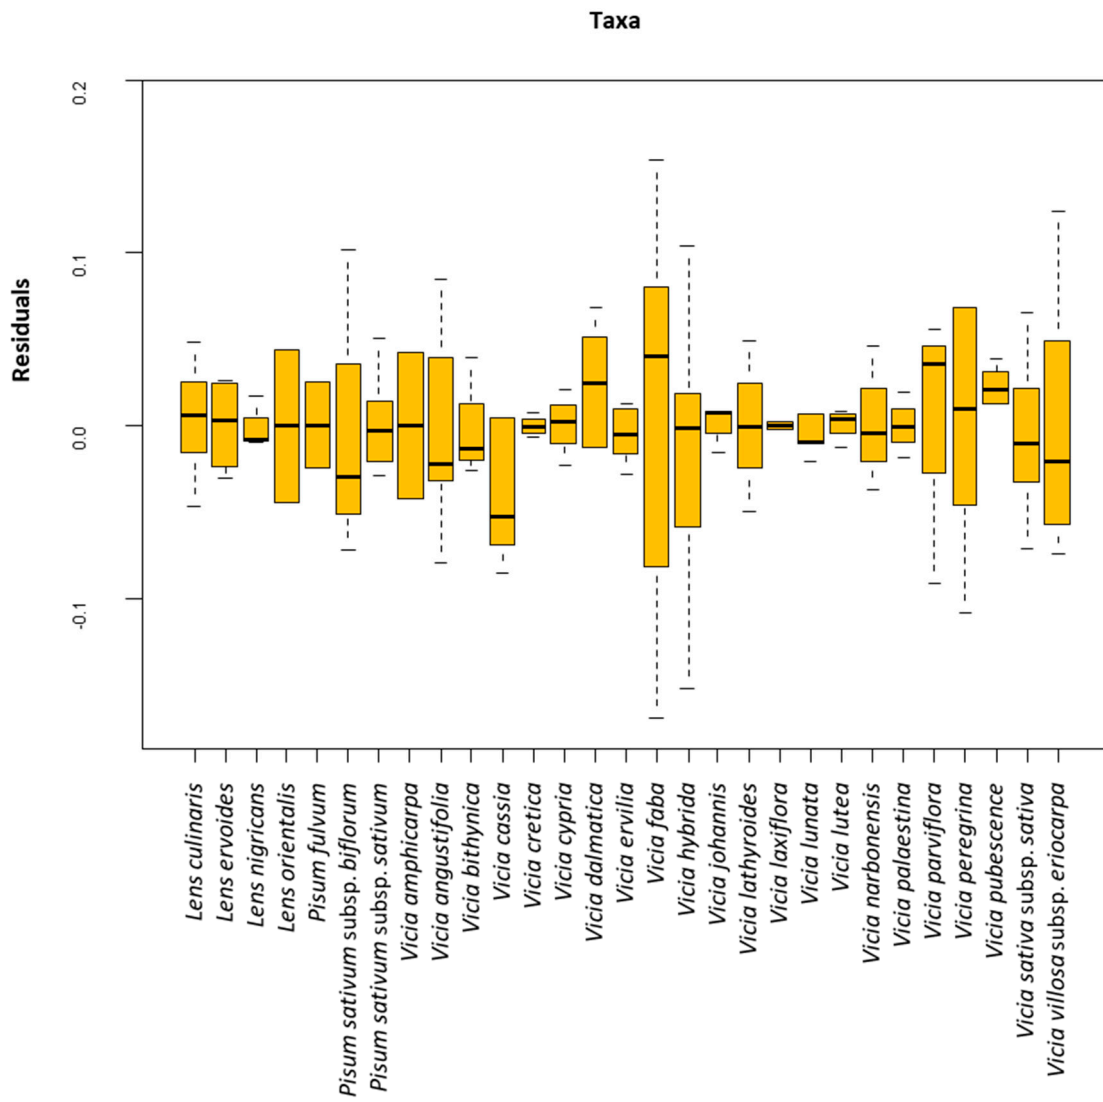

Supplementary Figure S1. Residuals analysis across species. A regression function, as well as independent and identically distributed errors were found to be consistent (means are positioned at the zero axis).
